# Supplementary material for: Modulation of Rat Cancer-Induced Bone Pain is Independent of Spinal Microglia Activity
Source: MDPI journal article supplement (doi:10.3390/cancers12102740), 2020-09-24
Supplement: s1 [file s1]

Supplementary Figures

# Modulation of Rat Cancer-Induced Bone Pain Is Independent of Spinal Microglia Activity

Marta Diaz-delCastillo, Rie Bager Hansen, Camilla K. Appel, Lykke Nielsen, Sascha N. Nielsen, Konstantinos Karyniotakis, Louise M. Dahl, Rikke B. Andreassen and Anne-Marie Heegaard

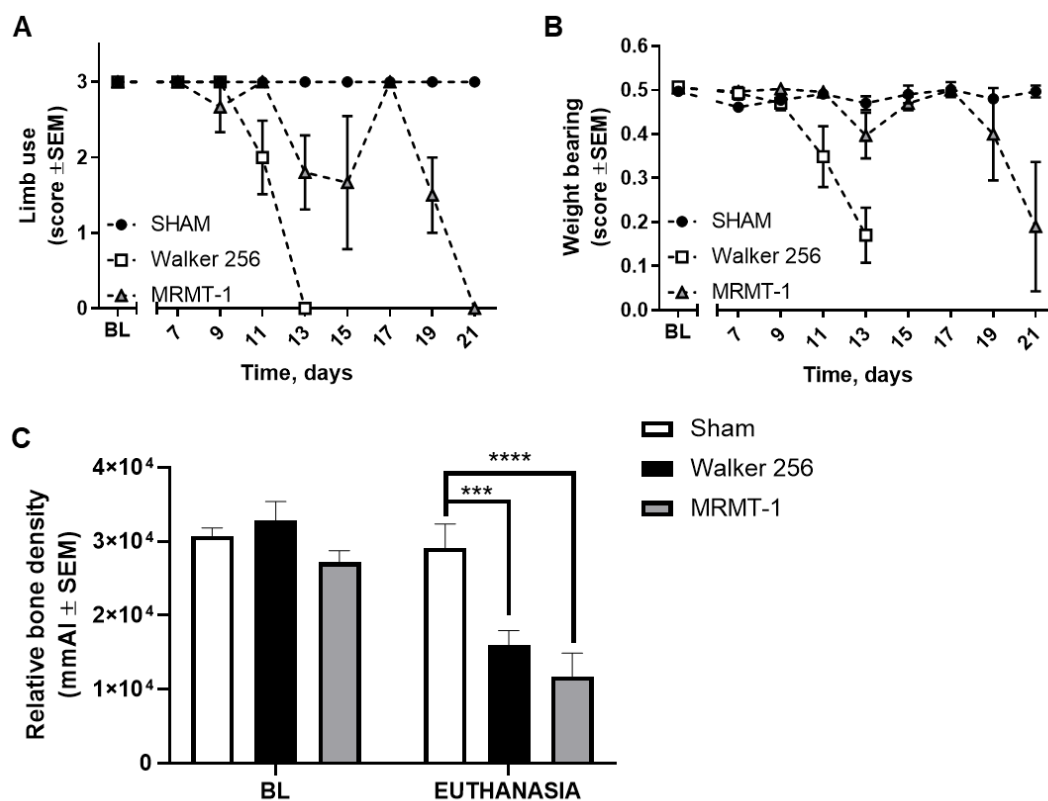

**Figure S1.** Intrafemoral inoculation of Walker 256 or MRMT-1 cells induces the decrease of limb use scores (A) and weight bearing ratios (B) in cancer-bearing rats, but not in sham. (C) Both MRMT-1 -inoculated tibias and Walker 256 -inoculated tibias show a significant decrease in relative bone density at euthanasia, compared with sham. Data are presented as mean  $\pm$  SEM. Sham n = 10; Walker 256 n = 7; MRMT-1 n = 6. \*\*\*  $p < 0.001$ ; \*\*\*\*  $p < 0.0001$ .

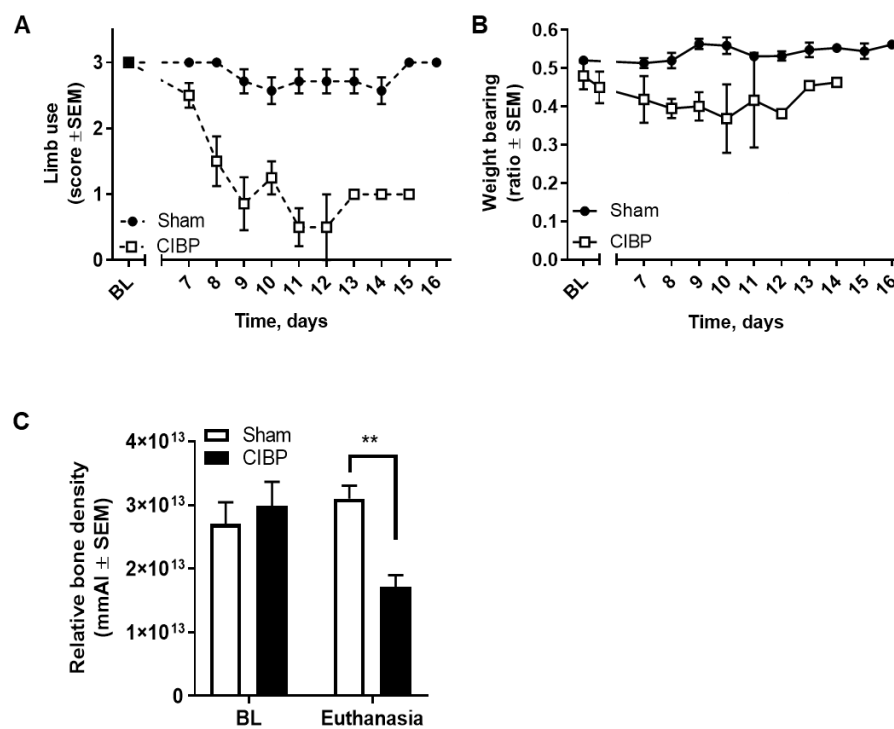

**Figure S2.** Male Sprague Dawley rats show a decrease in limb use scores (A) and weight bearing ratios (B) following intratibial inoculation of Walker 256 carcinoma cells. (C) Cancer-bearing tibias show a significant decrease in relative bone density at euthanasia, compared with sham. Data are presented as mean ± SEM. Sham n = 7; CIBP n = 8. \*\*  $p < 0.01$ ; \*\*\*\*  $p < 0.0001$ .
